# Supplementary material for: Comparative effectiveness of biologic monotherapy versus combination therapy for patients with psoriatic arthritis: results from the Corrona registry
Source: HighWire-hosted journal article supplement (doi:10.1136/rmdopen-2015-000181), 2015-12-01
Supplement: rmdopen-2015-000181supp.pdf [file rmdopen-2015-000181supp.pdf]

## Supplementary online appendix

Table S1 Univariate and multivariate analyses of predictors for TNFi persistence

| Variables                                           | Univariate analysis (n=497) |         | Multivariate analysis (n=495) |         |
|-----------------------------------------------------|-----------------------------|---------|-------------------------------|---------|
|                                                     | HR (95% CI)                 | p-value | HR (95% CI)                   | p-value |
| Used in univariate and multivariate analyses        |                             |         |                               |         |
| Age, years                                          | 1.000 (0.99 to 1.01)        | 0.99    | 0.997 (0.98 to 1.01)          | 0.66    |
| Sex, female vs male                                 | 1.279 (0.93 to 1.76)        | 0.13    | 1.256 (0.90 to 1.76)          | 0.18    |
| Initial therapy, combination therapy vs monotherapy | 0.948 (0.70 to 1.29)        | 0.73    | 0.956 (0.70 to 1.31)          | 0.78    |
| BMI, kg/m <sup>2</sup>                              | 1.030 (1.01 to 1.05)        | 0.01    | 1.011 (0.98 to 1.04)          | 0.44    |
| CDAI                                                | 1.037 (1.02 to 1.05)        | <0.001  | 1.027 (1.01 to 1.04)          | 0.001   |
| mHAQ                                                | 2.307 (1.56 to 3.42)        | <0.001  | 1.585 (1.00 to 2.51)          | 0.049   |
| PsA duration, years                                 | 0.978 (0.96 to 1.00)        | 0.04    | 0.982 (0.96 to 1.00)          | 0.10    |
| Alcohol use, yes vs no                              | 0.913 (0.67 to 1.25)        | 0.57    | 1.013 (0.73 to 1.40)          | 0.94    |
| Smoking: ever vs never                              |                             |         | 1.015 (0.82 to 1.25)          | 0.89    |
| Univariate: demographics                            |                             |         |                               |         |
| Ethnicity, Hispanic vs non-Hispanic <sup>*</sup>    | 0.259 (0.11 to 0.63)        | 0.003   |                               |         |
| Race, white vs others                               | 0.566 (0.27 to 1.19)        | 0.13    |                               |         |
| Marital status, married vs others                   | 1.057 (0.73 to 1.53)        | 0.77    |                               |         |
| Education, college or above vs high school or less  | 1.127 (0.82 to 1.56)        | 0.47    |                               |         |

| Variables                                                     | Univariate analysis (n=497) |         | Multivariate analysis (n=495) |         |
|---------------------------------------------------------------|-----------------------------|---------|-------------------------------|---------|
|                                                               | HR (95% CI)                 | p-value | HR (95% CI)                   | p-value |
| Univariate: disease activity or disability                    |                             |         |                               |         |
| Swollen joints, number                                        | 1.042 (1.00 to 1.08)        | 0.03    |                               |         |
| Tender joints, number                                         | 1.084 (1.06 to 1.11)        | <0.001  |                               |         |
| Physician global assessment of disease activity, point value  | 1.016 (1.01 to 1.03)        | 0.001   |                               |         |
| Patient global assessment of disease activity, point value    | 1.011 (1.00 to 1.02)        | 0.001   |                               |         |
| Physician global assessment of skin, point value <sup>*</sup> | 1.006 (1.00 to 1.01)        | 0.12    |                               |         |
| Patient global assessment of skin, point value <sup>*</sup>   | 1.011 (1.00 to 1.02)        | 0.001   |                               |         |
| Univariate: medical history and risk factors                  |                             |         |                               |         |
| History of coronary artery disease, yes vs no <sup>*</sup>    | 2.111 (1.02 to 4.36)        | 0.04    |                               |         |
| History of MTX, yes vs no                                     | 1.702 (1.06 to 2.74)        | 0.03    |                               |         |
| History of hypertension, yes vs no                            | 1.267 (0.90 to 1.79)        | 0.18    |                               |         |
| History of diabetes, yes vs no                                | 0.904 (0.48 to 1.69)        | 0.75    |                               |         |
| Smoking: previous vs never                                    | 1.365 (0.96 to 1.93)        | 0.20    |                               |         |
| Smoking: current vs never                                     | 1.037 (0.67 to 1.62)        |         |                               |         |
| CRP, mg/L <sup>*</sup>                                        | 1.000 (0.98 to 1.01)        | 0.77    |                               |         |
| ESR, mm/h <sup>*</sup>                                        | 1.008 (1.00 to 1.02)        | 0.19    |                               |         |
| Etanercept (n=155) vs adalimumab (n=214)                      | 1.051 (0.73 to 1.51)        | 0.78    |                               |         |
| Infliximab (n=110) vs adalimumab (n=214)                      | 0.841 (0.54 to 1.32)        | 0.45    |                               |         |
| Others (n=18) vs adalimumab (n=214)                           | 1.128 (0.39 to 3.22)        | 0.82    |                               |         |

<sup>\*</sup>Values not recorded for patients enrolled early in the study. Updates to the enrolment form added variables.

BMI, body mass index; CDAI, Clinical Disease Activity Index; CI, confidence interval; CRP, C-reactive protein; ESR, erythrocyte sedimentation rate; HR, hazard ratio; mHAQ, modified Health Assessment Questionnaire; MTX, methotrexate; PsA, psoriatic arthritis.

Table S2 Univariate and multivariate analyses of predictors for time to remission

| Variables                                           | Univariate analysis (n=380) |         | Multivariate analysis (n=379) |         |
|-----------------------------------------------------|-----------------------------|---------|-------------------------------|---------|
|                                                     | HR (95% CI)                 | p-value | HR (95% CI)                   | p-value |
| Used in univariate and multivariate analyses        |                             |         |                               |         |
| Age, years                                          | 0.991 (0.98 to 1.00)        | 0.11    | 0.999 (0.99 to 1.01)          | 0.86    |
| Sex, female vs male                                 | 0.744 (0.56 to 1.00)        | 0.046   | 0.826 (0.61 to 1.11)          | 0.21    |
| Initial therapy, combination therapy vs monotherapy | 1.090 (0.82 to 1.46)        | 0.56    | 1.153 (0.85 to 1.56)          | 0.35    |
| BMI, kg/m <sup>2</sup>                              | 0.940 (0.92 to 0.96)        | <0.001  | 0.955 (0.93 to 0.98)          | <0.001  |
| CDAI                                                | 0.944 (0.91 to 0.98)        | 0.002   | 0.964 (0.93 to 1.00)          | 0.052   |
| mHAQ                                                | 0.257 (0.15 to 0.44)        | <0.001  | 0.478 (0.28 to 0.83)          | 0.008   |
| PsA duration, years                                 | 0.999 (0.98 to 1.02)        | 0.93    | 0.997 (0.98 to 1.02)          | 0.77    |
| Alcohol use, yes vs no                              | 1.265 (0.95 to 1.69)        | 0.11    | 0.953 (0.70 to 1.29)          | 0.76    |
| Smoking: ever vs never                              |                             |         | 0.851 (0.69 to 1.05)          | 0.14    |
| Univariate: demographics                            |                             |         |                               |         |
| Ethnicity, Hispanic vs non-Hispanic <sup>*</sup>    | 0.777 (0.41 to 1.48)        | 0.44    |                               |         |
| Race, white vs others                               | 0.912 (0.41 to 2.02)        | 0.82    |                               |         |
| Marital status, married vs others                   | 1.014 (0.74 to 1.38)        | 0.93    |                               |         |
| Education, college or above vs high school or less  | 1.301 (0.97 to 1.75)        | 0.08    |                               |         |

| Variables                                                     | Univariate analysis (n=380) |         | Multivariate analysis (n=379) |         |
|---------------------------------------------------------------|-----------------------------|---------|-------------------------------|---------|
|                                                               | HR (95% CI)                 | p-value | HR (95% CI)                   | p-value |
| Univariate: disease activity or disability                    |                             |         |                               |         |
| Swollen joints, number                                        | 0.944 (0.90 to 0.99)        | 0.01    |                               |         |
| Tender joints, number                                         | 0.912 (0.85 to 0.98)        | 0.01    |                               |         |
| Physician global assessment of disease activity, point value  | 0.978 (0.96 to 0.99)        | 0.001   |                               |         |
| Patient global assessment of disease activity, point value    | 0.976 (0.97 to 0.98)        | <0.001  |                               |         |
| Physician global assessment of skin, point value <sup>*</sup> | 0.981 (0.97 to 0.99)        | <0.001  |                               |         |
| Patient global assessment of skin, point value <sup>*</sup>   | 0.991 (0.98 to 1.00)        | 0.04    |                               |         |
| Univariate: medical history and risk factors                  |                             |         |                               |         |
| History of coronary artery disease, yes vs no <sup>*</sup>    | 0.555 (0.25 to 1.26)        | 0.16    |                               |         |
| History of MTX, yes vs no                                     | 1.198 (0.79 to 1.81)        | 0.40    |                               |         |
| History of hypertension, yes vs no                            | 0.505 (0.34 to 0.74)        | 0.001   |                               |         |
| History of diabetes, yes vs no                                | 0.496 (0.26 to 0.94)        | 0.03    |                               |         |
| Smoking: previous vs never                                    | 0.732 (0.52 to 1.02)        | 0.07    |                               |         |
| Smoking: current vs never                                     | 0.654 (0.41 to 1.04)        |         |                               |         |
| CRP, mg/L <sup>*</sup>                                        | 1.007 (1.00 to 1.02)        | 0.16    |                               |         |
| ESR, mm/h <sup>*</sup>                                        | 0.989 (0.97 to 1.01)        | 0.25    |                               |         |
| Etanercept (n=123) vs adalimumab (n=161)                      | 0.777 (0.55 to 1.11)        | 0.16    |                               |         |
| Infliximab (n=82) vs adalimumab (n=161)                       | 0.902 (0.63 to 1.30)        | 0.58    |                               |         |
| Others (n=14) vs adalimumab (n=161)                           | 1.610 (0.76 to 3.41)        | 0.21    |                               |         |

<sup>\*</sup>Values not recorded for patients enrolled early in the study. Updates to the enrolment form added variables.

BMI, body mass index; CDAI, Clinical Disease Activity Index; CI, confidence interval; CRP, C-reactive protein; ESR, erythrocyte sedimentation rate; HR, hazard ratio; mHAQ, modified Health Assessment Questionnaire; MTX, methotrexate; PsA, psoriatic arthritis.
